# Supplementary material
Source: Springer Nature journal article supplement (https://www.springermedizin.de/resource/supplementary/12889_2012_5212_MOESM2_ESM.pdf/9495550)

## External help seeking

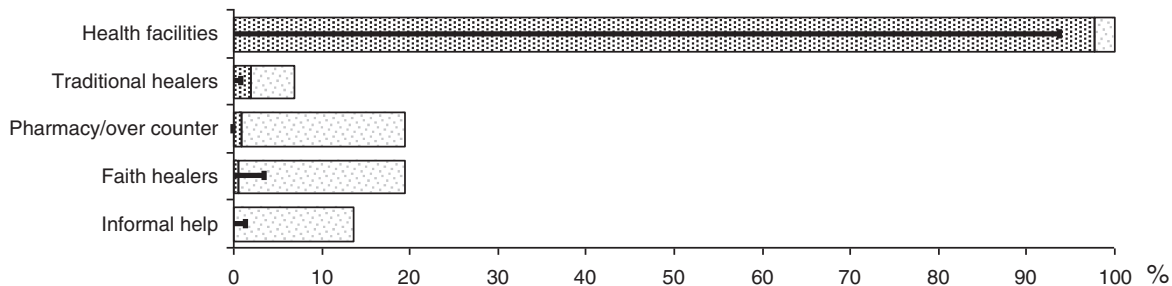

## Self-help

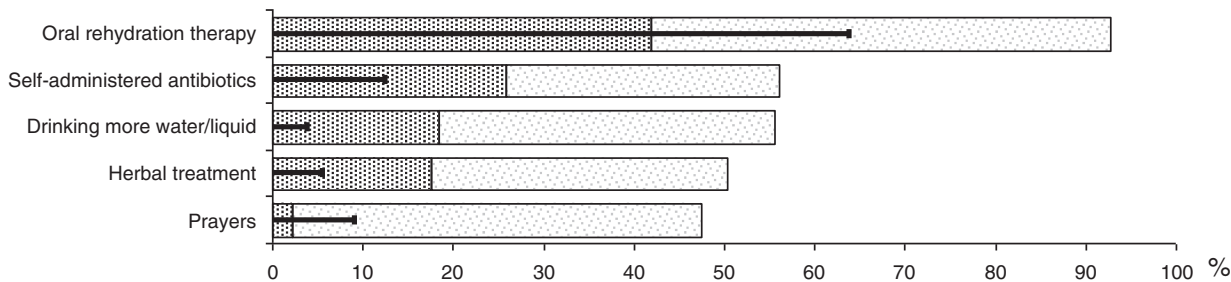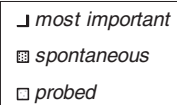

Supplement: MOESM2 [file 9495550]
